# Supplementary material for: IL-1 receptor antagonist therapy mitigates placental dysfunction and perinatal injury following Zika virus infection
Source: JCI journal article supplement (doi:10.1172/jci.insight.122678), 2019-02-28
Supplement: sd1 [file 1]

1 Revised manuscript (122678-INS-RG-RV-3) submitted to *JCI Insight* on 11 February 2019

2

3 **IL-1 receptor antagonist therapy mitigates placental dysfunction and perinatal injury**  
 4 **following Zika virus infection**

5

6 Jun Lei<sup>1†</sup>, Meghan S. Vermillion<sup>2,3†</sup>, Bei Jia<sup>1</sup>, Han Xie<sup>1</sup>, Li Xie<sup>1</sup>, Michael W. McLane<sup>1</sup>, Jeanne S.  
 7 Sheffield<sup>4</sup>, Andrew Pekosz<sup>2</sup>, Amanda Brown<sup>5</sup>, Sabra L. Klein<sup>2,6#</sup>, and Irina Burd<sup>1,5#</sup>

8

9 <sup>1</sup> Integrated Research Center for Fetal Medicine, Department of Gynecology and Obstetrics,  
 10 Johns Hopkins University School of Medicine, Baltimore, Maryland, USA

11 <sup>2</sup> W. Harry Feinstone Department of Molecular Microbiology and Immunology, Johns Hopkins  
 12 Bloomberg School of Public Health, Baltimore, Maryland, USA

13 <sup>3</sup> Department of Molecular and Comparative Pathobiology, Johns Hopkins University School of  
 14 Medicine, Baltimore, Maryland, USA

15 <sup>4</sup> Department of Obstetrics and Gynecology, Johns Hopkins School of Medicine, Baltimore,  
 16 Maryland, USA

17 <sup>5</sup> Department of Neurology, Johns Hopkins University School of Medicine, Baltimore,  
 18 Maryland, USA

19 <sup>6</sup> Department of Biochemistry and Molecular Biology, Johns Hopkins Bloomberg School of  
 20 Public Health, Baltimore, Maryland, USA

21

22 **Short title:** Zika virus and placental IL-1 $\beta$

23

24 **Conflicts:** The authors have declared that no conflict of interest exists.

25 #Address correspondence:

26 **Sabra L. Klein**

27 W. Harry Feinstone Department of Molecular Microbiology and Immunology

28 Johns Hopkins Bloomberg School of Public Health

29 615 North Wolfe Street

30 Room W2118

31 Baltimore, Maryland 21205, USA

32 [Tel: \(410\) 955-8898](tel:(410)955-8898)

33 [Sklein2@jhu.edu](mailto:Sklein2@jhu.edu)

34

35 **Irina Burd**

36 Integrated Research Center for Fetal Medicine & Department of Gynecology and Obstetrics

37 Johns Hopkins University School of Medicine

38 600 North Wolfe Street

39 Phipps 217

40 Baltimore, Maryland 21287, USA

41 [Tel:\(410\) 955-8496](tel:(410)955-8496)

42 [Iburd@jhmi.edu](mailto:iburd@jhmi.edu).

43

44 †Jun Lei and Meghan S. Vermillion contributed equally to this work.

## 45 Supplemental Figure 1.

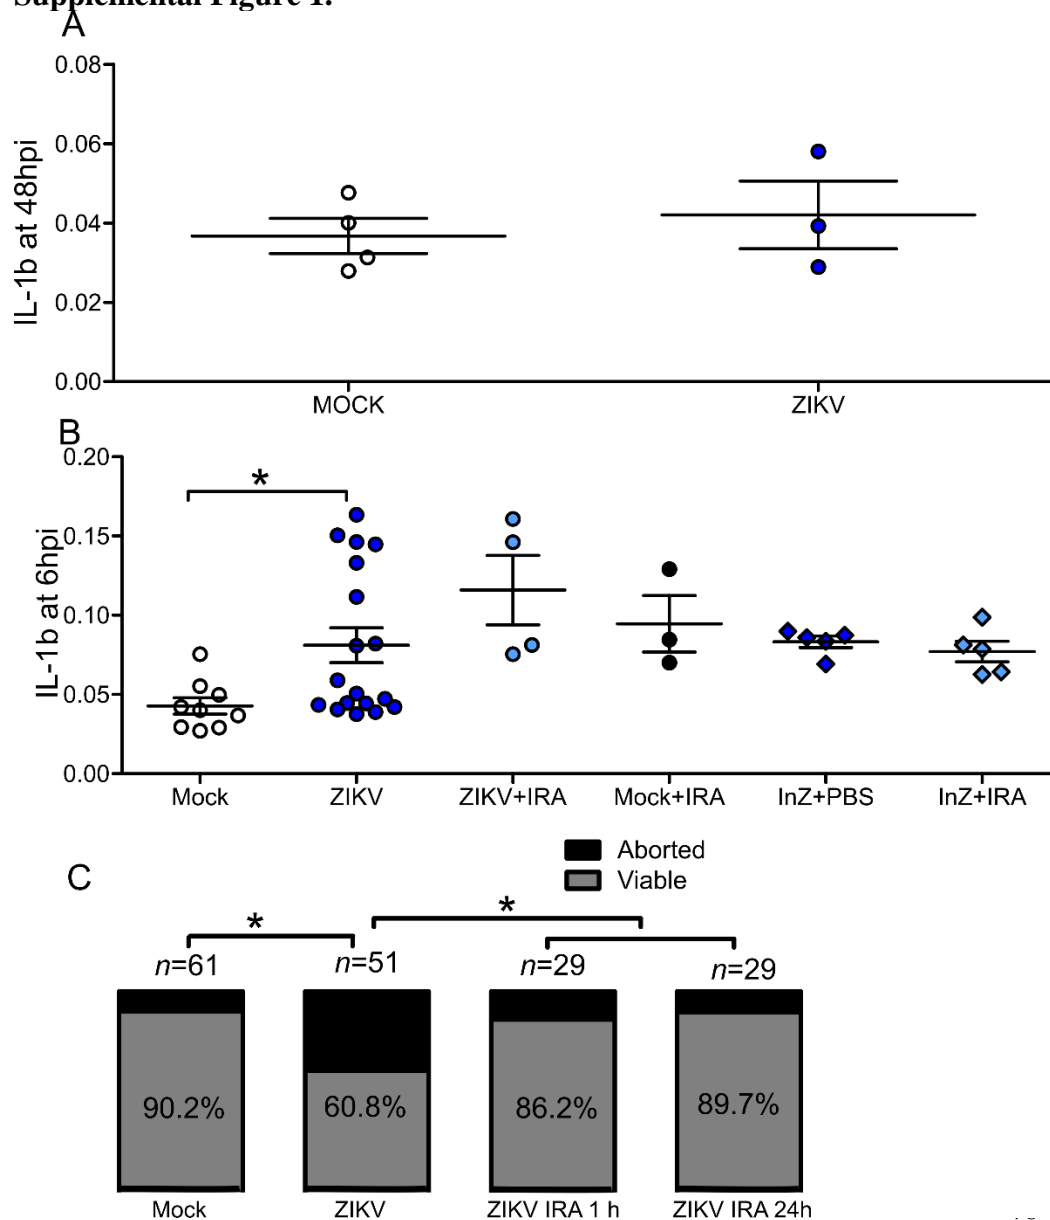

79

80

81 **Supplemental Fig. 1. Placental IL-1 $\beta$  in response to *in utero* exposure of ZIKV.** At  
 82 embryonic day (E) 10, pregnant CD-1 mice received an intrauterine (IU) injection of  $10^6$  TCID<sub>50</sub>  
 83 units of the 2015 Brazil ZIKV, inactivated ZIKV (InZ), or vehicle (mock) **A**. The concentration  
 84 of IL-1 $\beta$  (pg/100 $\mu$ g protein) was measured in placenta homogenates 48 hours after ZIKV  
 85 inoculation. **B**. The concentration of IL-1 $\beta$  (pg/100 $\mu$ g protein) was measured in placenta  
 86 homogenates 6 hours after the inoculation with ZIKV, InZ, or vehicle (mock), with or without  
 87 IRA treatment 3 hours after the surgery. **C**. Fetal viability in mock or ZIKV infected dams  
 88 treated with IRA 1 or 24 hpi was determined as the percentage of viable fetuses within the  
 89 inoculated uterine horn. (n = the total number of fetuses from 4 to 8 dams per group). Student's *t*-  
 90 test (**A**, **B**), and Chi-square test (**C**). \*=significant difference at  $p < 0.05$ .

## 91 Supplemental Figure 2.

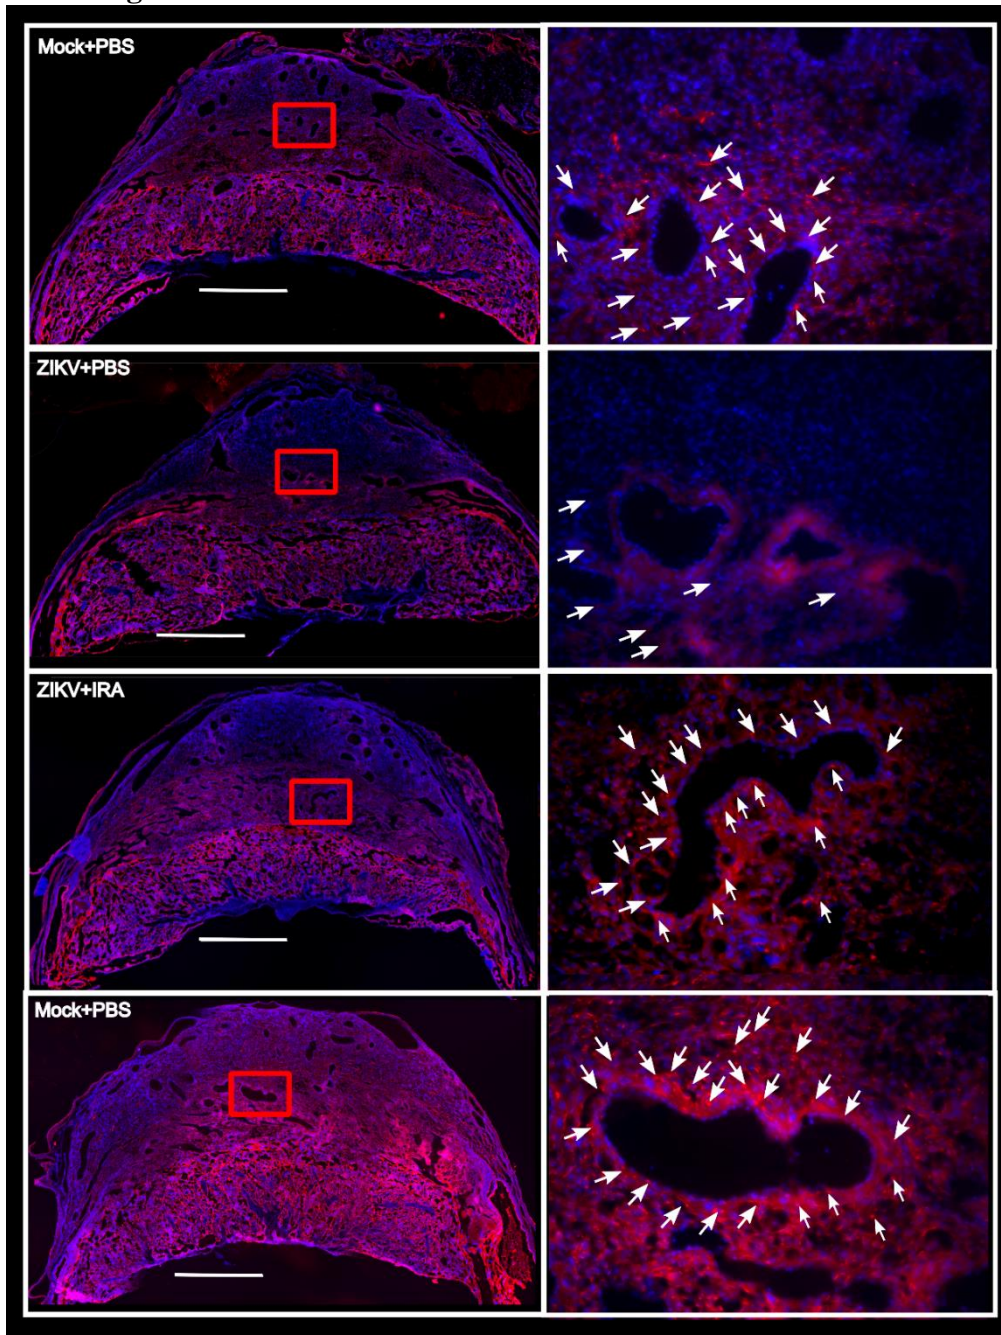

92 **Supplemental Fig. 2. IL-1 receptor antagonism during intrauterine ZIKV infection**  
 93 **improves trophoblast invasion.** At embryonic day (E) 10, pregnant CD-1 mice received an  
 94 intrauterine (IU) injection of  $10^6$  TCID<sub>50</sub> units of the 2015 Brazil ZIKV (n=5) or vehicle  
 95 (mock, n=4). Following ZIKV inoculation, pregnant dams were treated daily with either an  
 96 IL-1 receptor antagonist (IRA, n=4) or PBS (n=4) until tissue harvesting (E12).  
 97 Representative fluorescent immunostaining for cyokeratin (red) to label trophoblast cells  
 98 (white arrows) in the placenta. The right panel is the high magnification of the red box. Scale  
 99 bar: 1mm
